# Supplementary material for: Sm6WO12 tungstate supported nickel-based catalysts with enhanced resistance to coking and oxidation in auto-thermal reforming of acetic acid
Source: Royal Society of Chemistry journal article supplement (doi:10.1039/d4se01531b), 2025-01-01
Supplement: d4se01531b1.pdf [file d4se01531b1.pdf]

**Sm<sub>6</sub>WO<sub>12</sub> Tungstate Supported Nickel-Based Catalysts with Enhanced Resistance to  
Coking and Oxidation in Auto-thermal Reforming of Acetic Acid**

Xuemei Xie<sup>a,b</sup>, Yingchun Xu<sup>b</sup>, Mao Gan<sup>b</sup>, Ying Su<sup>b</sup>, Jinbo Liu<sup>b</sup>, Lihong Huang<sup>a,b,\*</sup>

<sup>a</sup> State Key Laboratory of Geohazard Prevention and Geoenvironment Protection (Chengdu University of Technology), Chengdu 610059, China

<sup>b</sup> College of Materials and Chemistry & Chemical Engineering, Chengdu University of Technology, Chengdu 610059, China

\* Corresponding author

E-mail address: [huanglihong06@cdut.cn](mailto:huanglihong06@cdut.cn)

**Table S1.**  $D_{Ni}$ , Ea and TOF- $H_2$  of NSW catalysts.

| Catalysts | $D_{Ni}^a$ (%) | TOF- $H_2$ ( $10^{-2} s^{-1}$ ) | Ea (kJ/mol) |
|-----------|----------------|---------------------------------|-------------|
| NS        | 1.6            | 1.56                            | 57.6        |
| NSW20     | 18.8           | 2.38                            | 43.5        |
| NSW40     | 1.8            | 1.61                            | 68.0        |

<sup>a</sup> The dispersion of Ni ( $D_{Ni}$ ) was calculated by the results of  $H_2$ -TPD assuming  $H_{ad}/Ni^0=1$ .

**Table S2.** Comparison of catalytic performance from reforming.

| Catalyst                                                    | T (°C) | Time (h) | $H_2$ yield (%) | TOF- $H_2$ ( $10^{-2} s^{-1}$ ) | reforming process | Ref.         |
|-------------------------------------------------------------|--------|----------|-----------------|---------------------------------|-------------------|--------------|
| Ni/ATP <sup>1</sup>                                         | 700    | -        | 79              | -                               | SR                | [1]          |
| Co/CaSBA-15 <sup>2</sup>                                    | 600    | 5        | 72              | -                               | SR                | [2]          |
| Co-Rh/CeO <sub>2</sub> <sup>3</sup>                         | 700    | 30       | 76              | -                               | SR                | [3]          |
| Ni@SiO <sub>2</sub> -T <sup>4</sup>                         | 750    | 10       | 58              | -                               | SR                | [4]          |
| Co-Ba-Al <sup>5</sup>                                       | 650    | 10       | 69              | 0.4                             | ATR               | [5]          |
| Ni/SmMn <sub>2</sub> O <sub>5</sub> <sup>6</sup>            | 700    | 10       | 76              | 0.6                             | ATR               | [6]          |
| Zn-Ni-Al-Fe-O <sup>7</sup>                                  | 650    | 10       | 69              | -                               | ATR               | [7]          |
| Ni/Sm <sub>6</sub> WO <sub>12</sub> <sup>current work</sup> | 650    | 10       | 70              | 2.4                             | ATR               | current work |

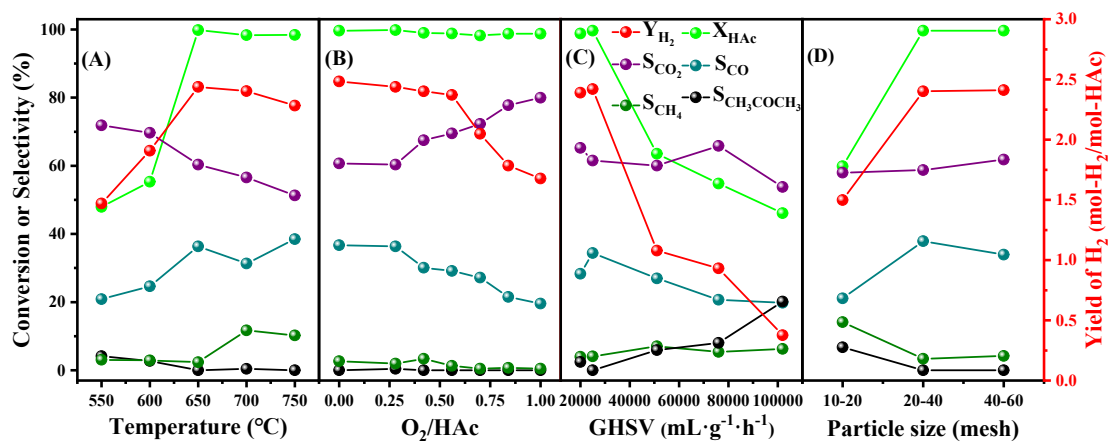

**Fig. S1.** Effect of (A) temperature, (B) O<sub>2</sub>/HAc, (C) GHSV and (D) particle size on the reactivity of NS20W in ATR of HAC.

## Notes and references

- 1 M. Chen, J. Hu, Y. Wang, C. Wang, Z. Tang, C. Li, D. Liang, W. Cheng, Z. Yang, H. Zhang. *Int. J. Hydrogen Energy*, 2021, **46**, 3651-3668.
- 2 I. C. A. Souza, R. L. Manfro, M. M. V. M. Souza. *Biomass Bioenergy*, 2022, **156**.
- 3 P. J. Megía, M. A. Soria, P. Cerqueira, A. J. Vizcaíno, A. Carrero, J. A. Calles, L. M. Madeira. *Catal. Today*, 2024, **429**.
- 4 J. Pu, K. Nishikado, N. Wang, T. T. Nguyen, T. Maki, E. W. Qian. *Appl. Catal., B*, 2018, **224**, 69-79.
- 5 Y. Xu, Y. Song, H. Chen, F. Liao, J. Huang, L. Huang. *J. Sol-Gel Sci. Technol.*, 2022, **105**, 202-211.
- 6 H. Chen, Q. Chen, X. Hu, C. Ding, L. Huang, N. Wang. *Materials*, 2024, **17**.
- 7 H. Yang, H.-g. Li, X.-y. Xie, Q. Wang, Y.-p. Duan, L.-h. Huang. *J. Fuel Chem. Technol.*, 2018, **46**, 1352-1358.
